# Supplementary material
Source: PubMed Central journal article supplement (PMC8120649)
Supplement: NIHMS1695200-supplement-Supplementary_Materials.pdf [file NIHMS1695200-supplement-Supplementary_Materials.pdf]

## Supplementary Materials for

### Imaging *Enterobacteriales* infections in patients using pathogen-specific positron emission tomography

Alvaro A. Ordonez, Luz M. Wintaco, Filipa Mota, Andres F. Restrepo, Camilo A. Ruiz-Bedoya, Carlos F. Reyes, Luis G. Uribe, Sudhanshu Abhishek, Franco R. D'Alessio, Daniel P. Holt, Robert F. Dannals, Steven P. Rowe, Victor R. Castillo, Martin G. Pomper, Ulises Granados\*, Sanjay K. Jain\*

\*Corresponding author. Email: [ulisesgranados@fcv.org](mailto:ulisesgranados@fcv.org) (U.G.); [sjain5@jhmi.edu](mailto:sjain5@jhmi.edu) (S.K.J.)

Published 14 April 2021, *Sci. Transl. Med.* **13**, eabe9805 (2021)  
DOI: 10.1126/scitranslmed.abe9805

#### The PDF file includes:

Fig. S1. Mechanism of  $^{18}\text{F}$ -FDS accumulation in bacteria.  
Fig. S2. Whole-body  $^{18}\text{F}$ -FDS PET/CT.  
Fig. S3. Biodistribution of  $^{18}\text{F}$ -FDS in unaffected tissues.  
Fig. S4. Bacterial burden and in vitro  $^{18}\text{F}$ -FDS uptake.  
Fig. S5. Correlation of  $^{18}\text{F}$ -FDS PET with host inflammatory cells.  
Fig. S6.  $^{18}\text{F}$ -FDS PET target-to-nontarget ratios for all patients.  
Fig. S7. Hamster model pathology.  
Fig. S8. Patients with false-negative  $^{18}\text{F}$ -FDS PET.  
Fig. S9.  $^{18}\text{F}$ -FDS accumulation in fluids.  
Table S1. Selection criteria for patient enrollment in the clinical study.  
Table S2. Patient characteristics.  
Legend for data file S1  
Legends for movies S1 and S2

#### Other Supplementary Material for this manuscript includes the following:

(available at [stm.sciencemag.org/cgi/content/full/13/589/eabe9805/DC1](http://stm.sciencemag.org/cgi/content/full/13/589/eabe9805/DC1))

Data file S1 (Microsoft Excel format). Individual subject-level data.  
Movie S1 (.mp4 format).  $^{18}\text{F}$ -FDS PET/CT in a SARS-CoV-2–infected hamster.  
Movie S2 (.mp4 format).  $^{18}\text{F}$ -FDS PET/CT in a SARS-CoV-2 and *K. pneumoniae* coinfecting hamster.

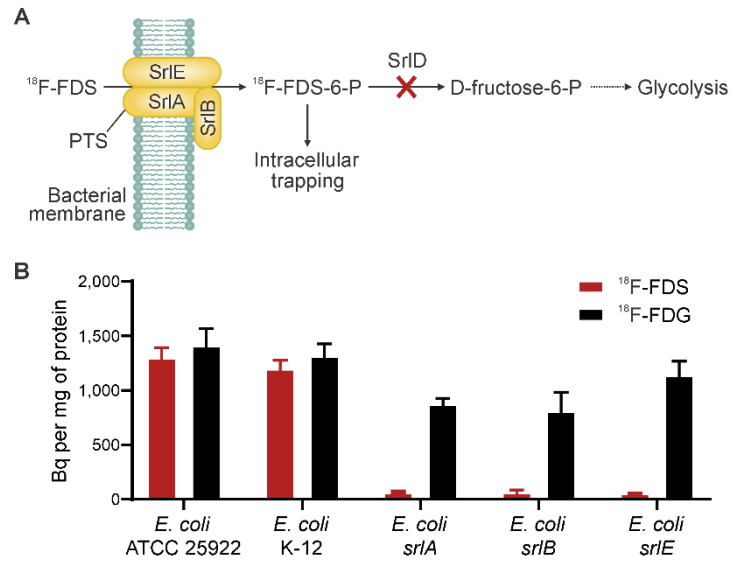

**Fig. S1. Mechanism of  $^{18}\text{F-FDS}$  accumulation in bacteria.** (A) *Enterobacteriales* can utilize sorbitol as a sole carbon source.  $^{18}\text{F-FDS}$  uptake in *Enterobacteriales* occurs via a metabolically conserved pathway mediated by a sorbitol-specific phosphoenolpyruvate-dependent, sugar-transporting phosphotransferase system (PTS) (9). In *E. coli*, PTS is composed of three subunits: SrlE, SrlA and SrlB. The *srl* operon is induced by sorbitol, and PTS transports sorbitol with low micromolar affinities (10). Sorbitol 6-phosphate is then oxidized by sorbitol-6-phosphate 2-dehydrogenase (SrlD) into D-fructose 6-phosphate which is subsequently metabolized, primarily via glycolysis.  $^{18}\text{F-FDS}$  6-phosphate is not recognized as a substrate by the highly specific bacterial SrlD and is trapped inside the bacteria. (B) In vitro uptake of  $^{18}\text{F-FDS}$  and  $^{18}\text{F-FDG}$  at 120 min in *E. coli* ATCC 25922 (reference strain), *E. coli* K-12 (parent strain) and *E. coli* K-12 *srlA*, *srlB*, and *srlE* knockout strains. Data represented as mean and standard deviation ( $n = 5$  replicates for each bacterial strain).

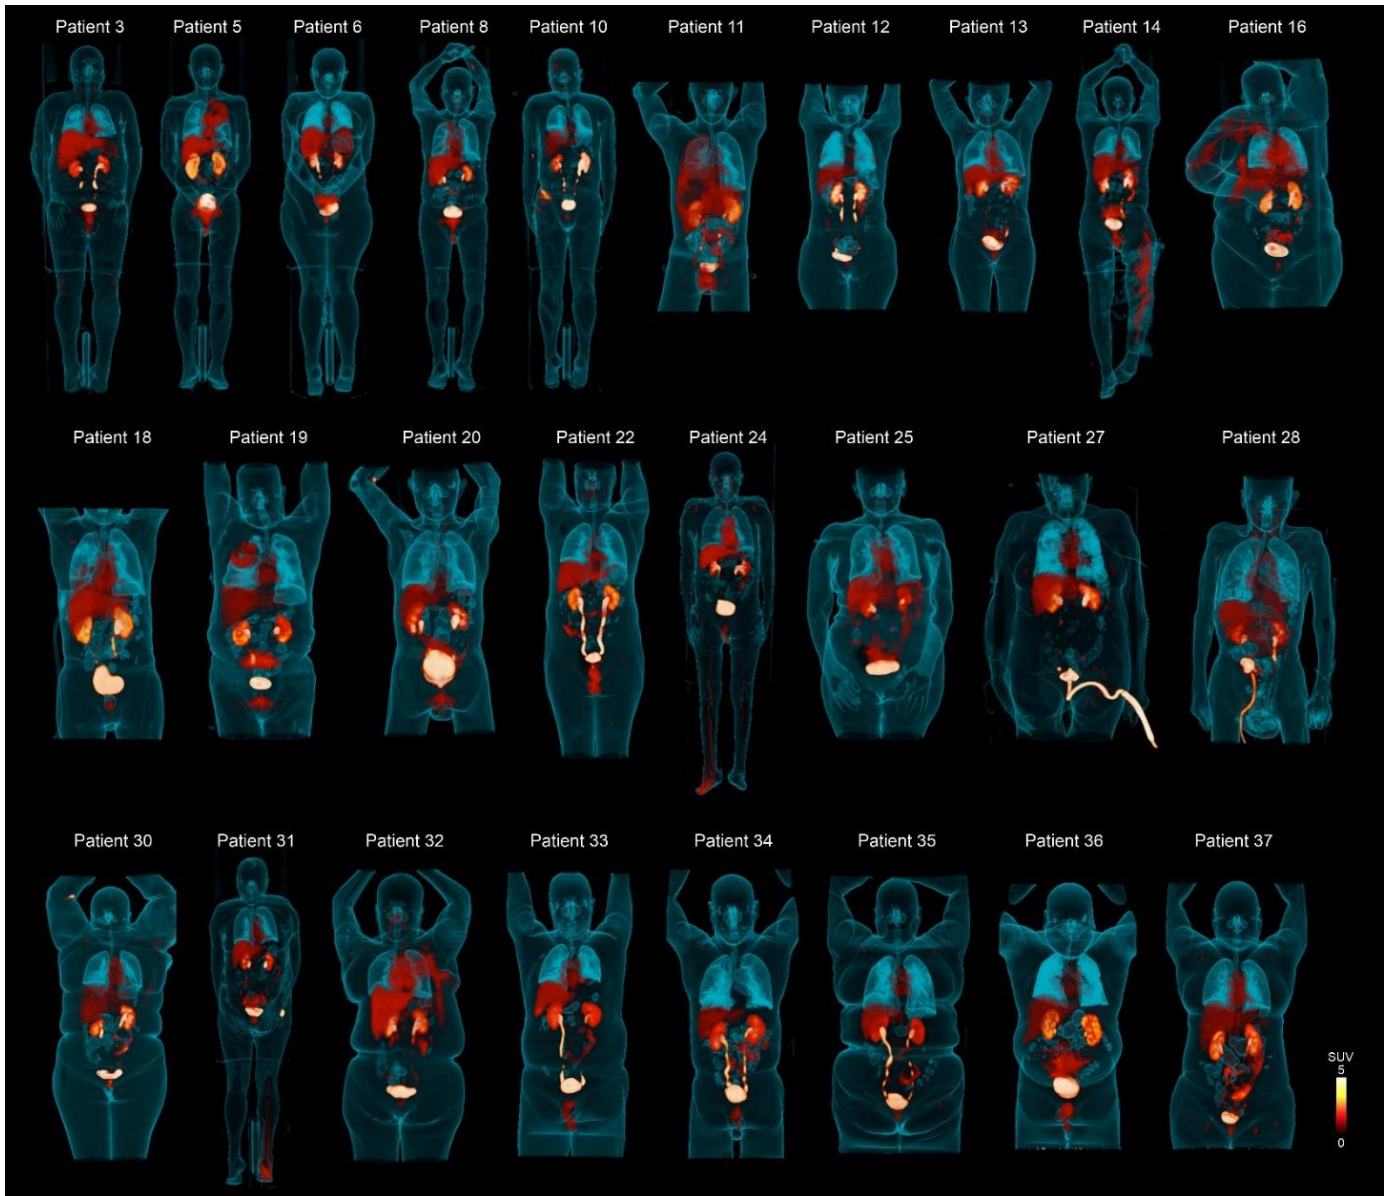

**Fig. S2. Whole body  $^{18}\text{F}$ -FDS PET/CT.** Three-dimensional maximum intensity projections 1 h after tracer injection are shown for all 26 patients. The CT is represented in blue, while the  $^{18}\text{F}$ -FDS PET signal is represented in orange-red. All images are represented using the same standardized uptake value (SUV) scale (0-5).

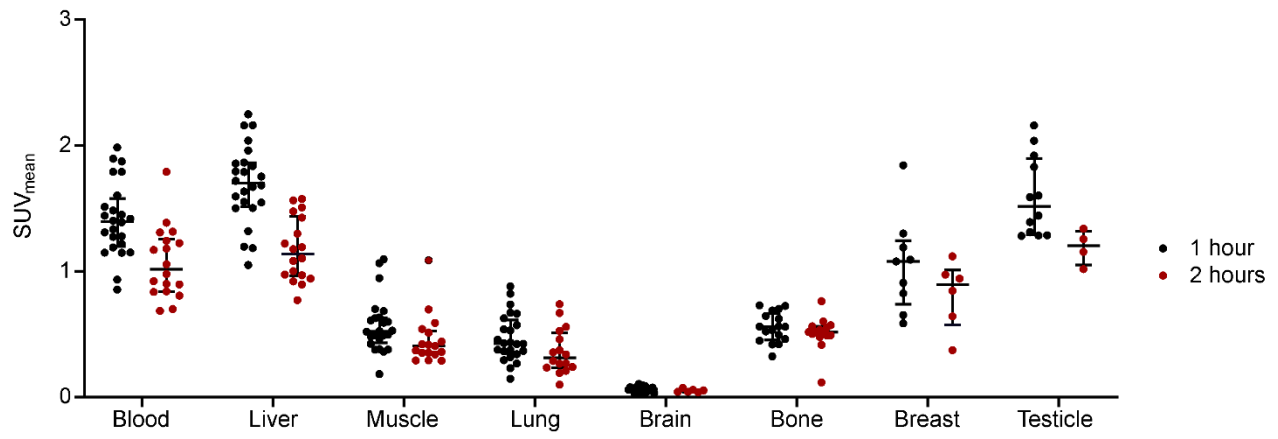

**Fig. S3. Biodistribution of  $^{18}\text{F}$ -FDS in unaffected tissues.** The mean standardized uptake value ( $\text{SUV}_{\text{mean}}$ ) derived from  $^{18}\text{F}$ -FDS PET for all 26 patients at 1 h (black) and 2 h (red) after tracer injection is shown. Data is represented as median and IQR.

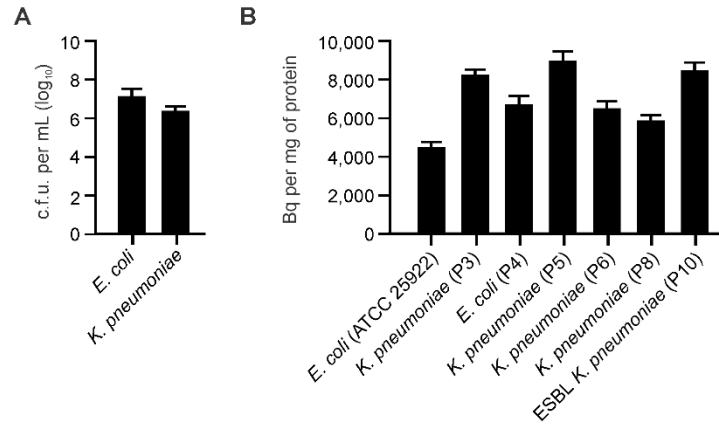

**Fig. S4. Bacterial burden and in vitro <sup>18</sup>F-FDS uptake.** (A) Bacterial burden in biological samples collected from patients with *E. coli* or *K. pneumoniae* infections. Data represented as mean and standard deviation (n = 3 isolates for each strain). (B) In vitro <sup>18</sup>F-FDS uptake in *Enterobacteriales* strains (including one MDR, ESBL-producing strain) isolated from infected patients from this study compared to a reference strain (*E. coli* ATCC 25922). Data represented as mean and standard deviation (n = 6 replicates for each strain).

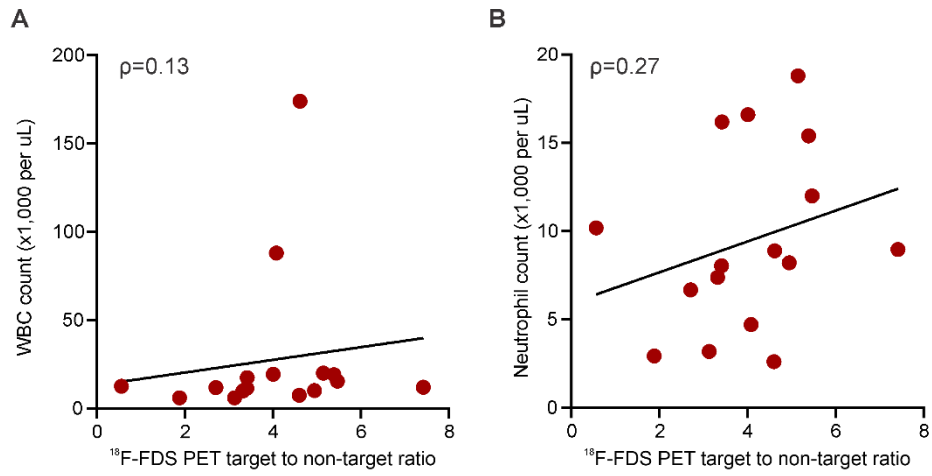

**Fig. S5. Correlation of  $^{18}\text{F}$ -FDS PET with host inflammatory cells.** Correlation of  $^{18}\text{F}$ -FDS PET target to non-target ratio 2 h post-injection with (A) peripheral white blood cell (WBC) counts (Pearson  $\rho = 0.13$ ,  $P = 0.62$ ) and (B) peripheral neutrophil counts (Pearson  $\rho = 0.27$ ,  $P = 0.30$ ).

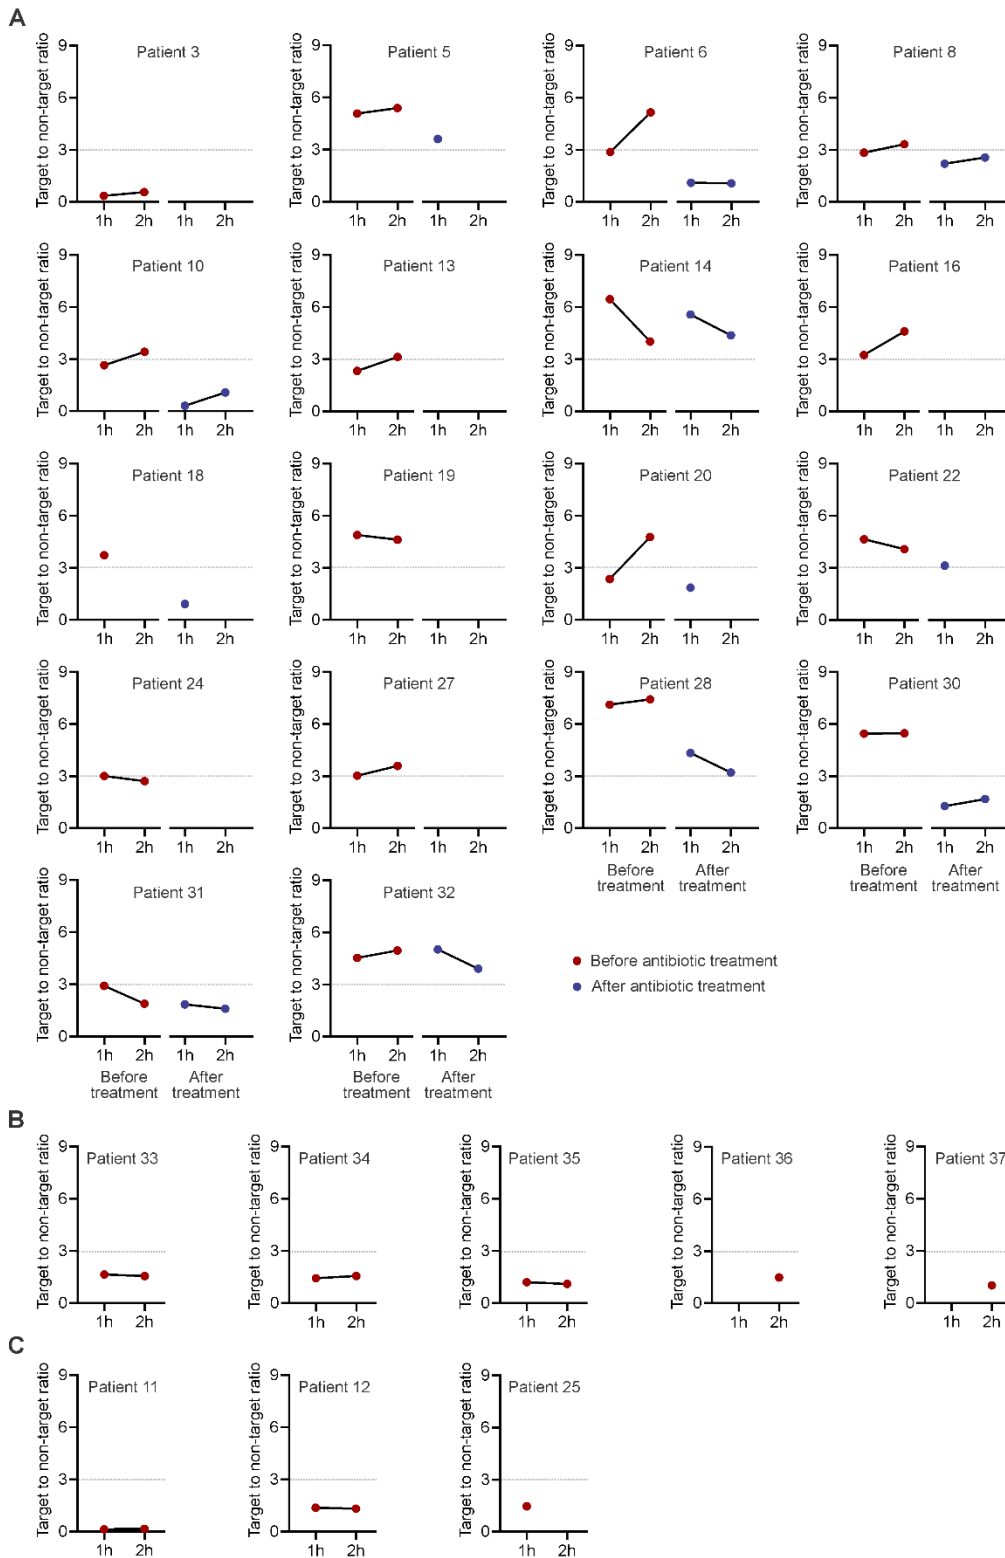

**Fig. S6.  $^{18}\text{F}$ -FDS PET target-to-nontarget ratios for all patients.**  $^{18}\text{F}$ -FDS PET target-to-non-target ratio at 1 and 2 h after tracer injection are shown for all 26 patients. **(A)** Microbiologically confirmed *Enterobacterales* infection, and the subset of patients imaged again after completion of antibiotic treatment. **(B)** Confirmed inflammatory or oncological disease and **(C)** microbiologically confirmed infections due to non-*Enterobacterales*. The dotted line indicates the target-to-nontarget ratio cut off of 3, determined in this study to be indicative of infection.



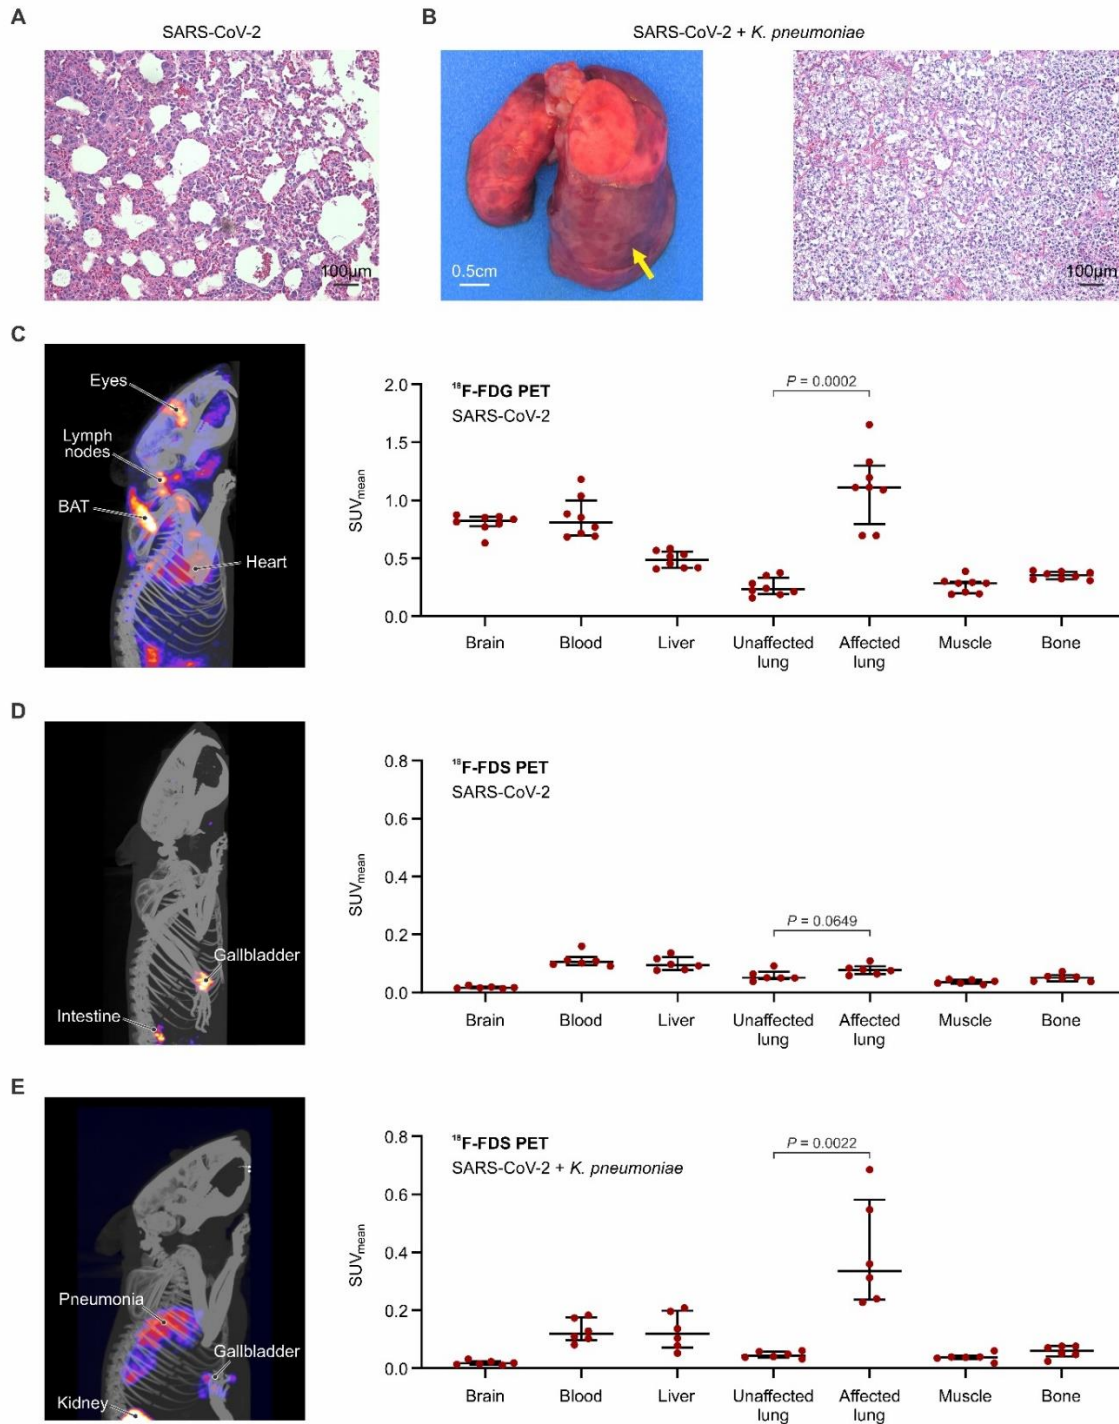

**Fig. S7. Hamster model pathology.** (A) Hematoxylin and eosin (H&E) staining of lungs from a representative SARS-CoV-2-infected hamster 7 days post-infection. (B) Gross pathology (yellow arrow indicates affected area) and histology (H&E) of the lungs of a hamster infected with SARS-CoV-2 and *K. pneumoniae*. (C) Three-dimensional maximum intensity projection (MIP) of an animal infected with SARS-CoV-2 and imaged with <sup>18</sup>F-FDG and corresponding tissue biodistribution for all animals (n = 8) represented as mean standardized uptake value (SUV<sub>mean</sub>). (D) <sup>18</sup>F-FDS PET/CT MIP of an animal infected with SARS-CoV-2 and corresponding tissue biodistribution for all animals (n = 6). (E) <sup>18</sup>F-FDS PET/CT MIP of an animal infected with SARS-CoV-2 and *K. pneumoniae* and corresponding tissue biodistribution for all animals (n = 6). Data is represented as median and IQR. Statistical comparisons performed using a two-tailed Mann-Whitney *U* test. BAT, brown adipose tissue.



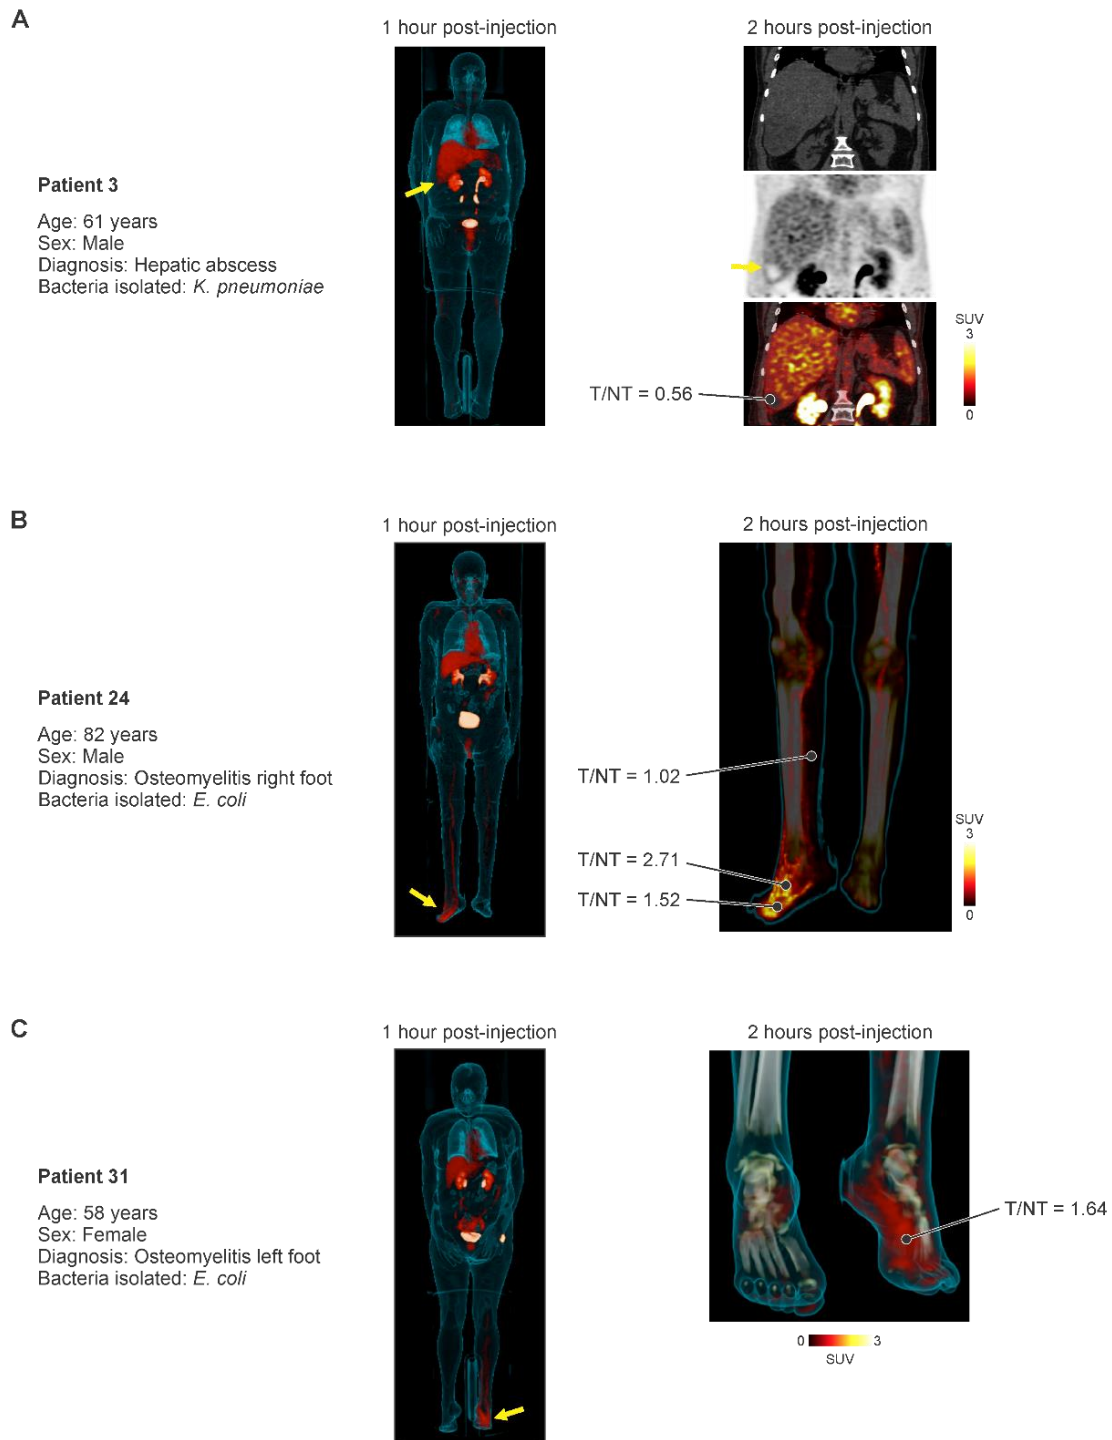

**Fig. S8. Patients with false-negative  $^{18}\text{F}$ -FDS PET.** (A) Three-dimensional maximum intensity projection (MIP) shown on the left, coronal CT (top), PET (middle), and overlaid PET/CT (bottom) shown on the right from 61-year-old male presenting with a hepatic abscess due to *K. pneumoniae* with a focus of photopenia (arrow). (B and C) Three-dimensional MIP for whole body (left panels) and localized site of infection (right panels) from two patients with diabetes with microbiologically confirmed foot osteomyelitis. While a higher  $^{18}\text{F}$ -FDS signal can be visually assessed at the infection site, the target-to-nontarget tissue ratio (TNT) is below the cutoff of 3. The yellow arrows point to the site of infection.

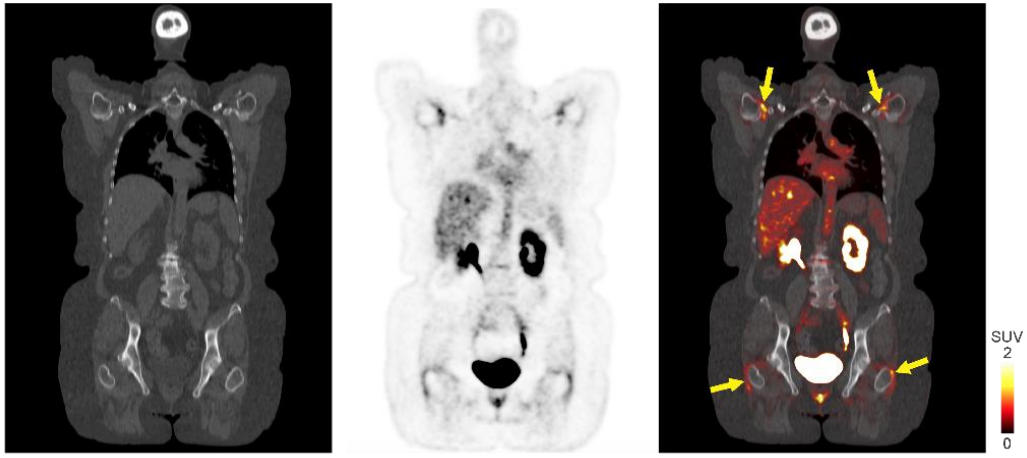

**Fig. S9. <sup>18</sup>F-FDS accumulation in fluids.** Coronal CT (left), PET (middle), and overlaid PET/CT (right) from a patient with interstitial lung disease. <sup>18</sup>F-FDS PET signal was observed in the synovial fluid (yellow arrows).

**Table S1. Selection criteria for patient enrollment in the clinical study.**

- Greater than or equal to 18 years old
- Patients with microbiologically confirmed *Enterobacterales* infection OR with high suspicion for *Enterobacterales* infection with microbiological-confirmation anticipated within 72 hours of imaging:
  - Received no or  $\leq$  72 hours of antibiotic treatment for the current episode of infection by the time of first  $^{18}\text{F}$ -FDS PET/CT
  - Microbiological-confirmation was defined as the isolation of bacteria from a sample obtained directly from the infection site
  - Patients with suspected infection without microbiological-confirmation were excluded from the study analysis
- Control patients: Confirmed inflammatory or oncologic disease and clinically determined not to have an infection
- Determined by the patient's medical team to be stable to participate in the study
- Not pregnant
- Serum creatinine  $<$  3 times the upper limit of normal
- Total bilirubin  $<$  3 times the upper limit of normal
- Liver transaminases  $<$  5 times the upper limit of normal
- Not treated with an investigational drug, biologic, or therapeutic device within 30 days prior to the  $^{18}\text{F}$ -FDS PET/CT
- Adequate venous access
- Ability to provide written informed consent

**Table S2. Patient characteristics.**

| ID | Age (years) | Sex | Weight (kg) | Diagnosis                   | Comorbidities              | Pathogen isolated                                        | Sample obtained from   | Neutrophil count (x10 <sup>3</sup> /μL) | Notes    |
|----|-------------|-----|-------------|-----------------------------|----------------------------|----------------------------------------------------------|------------------------|-----------------------------------------|----------|
| 1  | 54          | F   | 53          | Brain abscess               | Chagas disease             | No sample                                                | -                      | 7.20                                    | Excluded |
| 2  | 69          | M   | 74          | Pneumonia                   | DM                         | <i>Raoultella planticola</i>                             | BAL                    | 6.07                                    | Excluded |
| 3  | 61          | M   | 84          | Hepatic abscess             | DM, CKD                    | <i>Klebsiella pneumoniae</i>                             | Abscess drainage       | 10.20                                   |          |
| 4  | 44          | F   | 60          | Peritonitis                 | Abdominal trauma           | <i>Escherichia coli</i> and <i>Klebsiella pneumoniae</i> | Peritoneal fluid       | 5.81                                    | Excluded |
| 5  | 67          | M   | 59          | Pneumonia                   | Lung cancer                | <i>Klebsiella pneumoniae</i>                             | BAL                    | 15.40                                   |          |
| 6  | 35          | F   | 69          | Abdominal abscess           | Gastric cancer             | <i>Klebsiella pneumoniae</i>                             | Abscess drainage       | 18.80                                   |          |
| 7  | 33          | M   | 55          | Abdominal collection        | Appendicitis, post-surgery | Negative cultures                                        | Collection drainage    | 8.64                                    | Excluded |
| 8  | 70          | M   | 70          | Pleural empyema             | -                          | <i>Klebsiella pneumoniae</i>                             | BAL                    | 7.39                                    |          |
| 9  | 63          | F   | 73          | Hepatic abscess             | DM, CKD                    | <i>Escherichia coli</i>                                  | Abscess drainage       | 12.40                                   | Excluded |
| 10 | 38          | M   | 69          | Intracranial infection      | Urachal cancer             | ESBL <i>K. pneumoniae</i>                                | CSF and wound drainage | 16.20                                   |          |
| 11 | 31          | M   | 65          | Hepatic abscess             | -                          | <i>Entamoeba histolytica</i>                             | Abscess drainage       | 11.90                                   |          |
| 12 | 35          | F   | 35          | Bronchitis / pneumonia      | Asthma                     | <i>Pseudomonas aeruginosa</i>                            | BAL                    | 3.88                                    |          |
| 13 | 60          | F   | 42          | Bronchiectasis exacerbation | -                          | <i>Klebsiella pneumoniae</i>                             | BAL                    | 3.19                                    |          |
| 14 | 33          | M   | 63          | Infected bone fracture      | Leg trauma                 | ESBL <i>E. coli</i>                                      | Tissue sample          | 16.60                                   |          |
| 15 | 70          | M   | 73          | Fournier gangrene           | DM                         | <i>Klebsiella pneumoniae</i>                             | Tissue sample          | 15.40                                   | Excluded |
| 16 | 65          | F   | 92          | Cellulitis right arm        | Breast cancer              | <i>Klebsiella aerogenes</i>                              | Tissue sample          | 2.62                                    |          |
| 17 | 70          | M   | 57          | Sacral ulcer                | DM                         | <i>Escherichia coli</i>                                  | Tissue sample          | 17.40                                   | Excluded |
| 18 | 69          | M   | 65          | Pneumonia                   | COPD                       | <i>Klebsiella pneumoniae</i>                             | BAL                    | 15.20                                   |          |
| 19 | 64          | M   | 80          | Pneumonia and aspergillosis | AML                        | <i>Enterobacter cloacae</i>                              | BAL                    | 8.89                                    |          |
| 20 | 78          | M   | 60          | Pneumonia                   | Gastric cancer             | <i>Klebsiella pneumoniae</i>                             | BAL                    | 9.36                                    |          |

|                                                                                |    |   |     |                           |                         |                                                                 |                     |       |          |
|--------------------------------------------------------------------------------|----|---|-----|---------------------------|-------------------------|-----------------------------------------------------------------|---------------------|-------|----------|
| 21                                                                             | 74 | M | 84  | Abdominal collection      | Nephrectomy             | <i>Citrobacter freundii</i><br>and <i>Klebsiella pneumoniae</i> | Collection drainage | 7.81  | Excluded |
| 22                                                                             | 59 | M | 83  | Ischiorectal abscess      | Fournier gangrene       | ESBL <i>E. coli</i>                                             | Tissue sample       | 4.72  |          |
| 23                                                                             | 68 | M | 83  | Pneumonia                 | Lung cancer             | Negative cultures                                               | Lung biopsy         | 11.20 | Excluded |
| 24                                                                             | 82 | M | 68  | Osteomyelitis right foot  | DM, PAD                 | <i>Escherichia coli</i>                                         | Tissue sample       | 6.68  |          |
| 25                                                                             | 74 | F | 52  | Pneumonia                 | Osteoporosis            | <i>Mycobacterium tuberculosis</i>                               | BAL                 | 3.81  |          |
| 26                                                                             | 53 | M | 45  | Abdominal collection      | Pancreatitis, post-ERCP | <i>Klebsiella aerogenes</i>                                     | Blood               | 4.01  | Excluded |
| 27                                                                             | 51 | F | 60  | Pneumonia                 | Pulmonary embolism      | <i>Klebsiella pneumoniae</i>                                    | BAL                 | 8.05  |          |
| 28                                                                             | 91 | M | 91  | Pneumonia                 | COPD, prostate cancer   | ESBL <i>K. pneumoniae</i>                                       | BAL                 | 8.97  |          |
| 29                                                                             | 78 | M | 70  | Subscapular abscess       | Hypertension            | Gram negative bacilli from stain                                | Abscess drainage    | 6.19  | Excluded |
| 30                                                                             | 41 | F | 101 | Cellulitis left arm       | Obesity, hypertension   | <i>Serratia marcescens</i>                                      | Tissue sample       | 12.00 |          |
| 31                                                                             | 58 | F | 60  | Osteomyelitis left foot   | DM, PAD                 | <i>Escherichia coli</i>                                         | Tissue sample       | 2.94  |          |
| 32                                                                             | 67 | F | 59  | Cellulitis left breast    | Breast cancer, DM       | <i>Klebsiella aerogenes</i>                                     | Tissue sample       | 8.22  |          |
| <b>Patients with inflammatory and/or oncological disease without infection</b> |    |   |     |                           |                         |                                                                 |                     |       |          |
| 33                                                                             | 64 | M | 93  | Interstitial lung disease | -                       | -                                                               | -                   | -     |          |
| 34                                                                             | 60 | M | 74  | Interstitial lung disease | -                       | -                                                               | -                   | -     |          |
| 35                                                                             | 59 | F | 84  | Interstitial lung disease | -                       | -                                                               | -                   | -     |          |
| 36                                                                             | 54 | M | 86  | Interstitial lung disease | -                       | -                                                               | -                   | -     |          |
| 37                                                                             | 64 | M | 89  | Breast cancer             | -                       | -                                                               | -                   | -     |          |

**Table notes:** Type 2 diabetes mellitus (DM), chronic kidney disease (CKD), acute myeloid leukemia (AML), peripheral artery disease (PAD), endoscopic retrograde cholangiopancreatography (ERCP), bronchoalveolar lavage (BAL), extended-spectrum betalactamase (ESBL), cerebrospinal fluid (CSF), chronic obstructive pulmonary disease (COPD).

**Data file S1. Individual subject-level data.** (Excel file)

**Movie S1.  $^{18}\text{F}$ -FDS PET/CT in a SARS-CoV-2-infected hamster.** CT (left) and PET/CT overlay (right) of  $^{18}\text{F}$ -FDS in a representative animal infected with SARS-CoV-2.  $^{18}\text{F}$ -FDS signal is observed in the kidneys, gallbladder and intestine due to normal excretion.

**Movie S2.  $^{18}\text{F}$ -FDS PET/CT in a SARS-CoV-2 and *K. pneumoniae* coinfecting hamster.** CT (left) and PET/CT overlay (right) of  $^{18}\text{F}$ -FDS in a representative animal infected with SARS-CoV-2 and *K. pneumoniae*.
